# Supplementary material
Source: PubMed Central journal article supplement (PMC3943873)

# Figure S1A

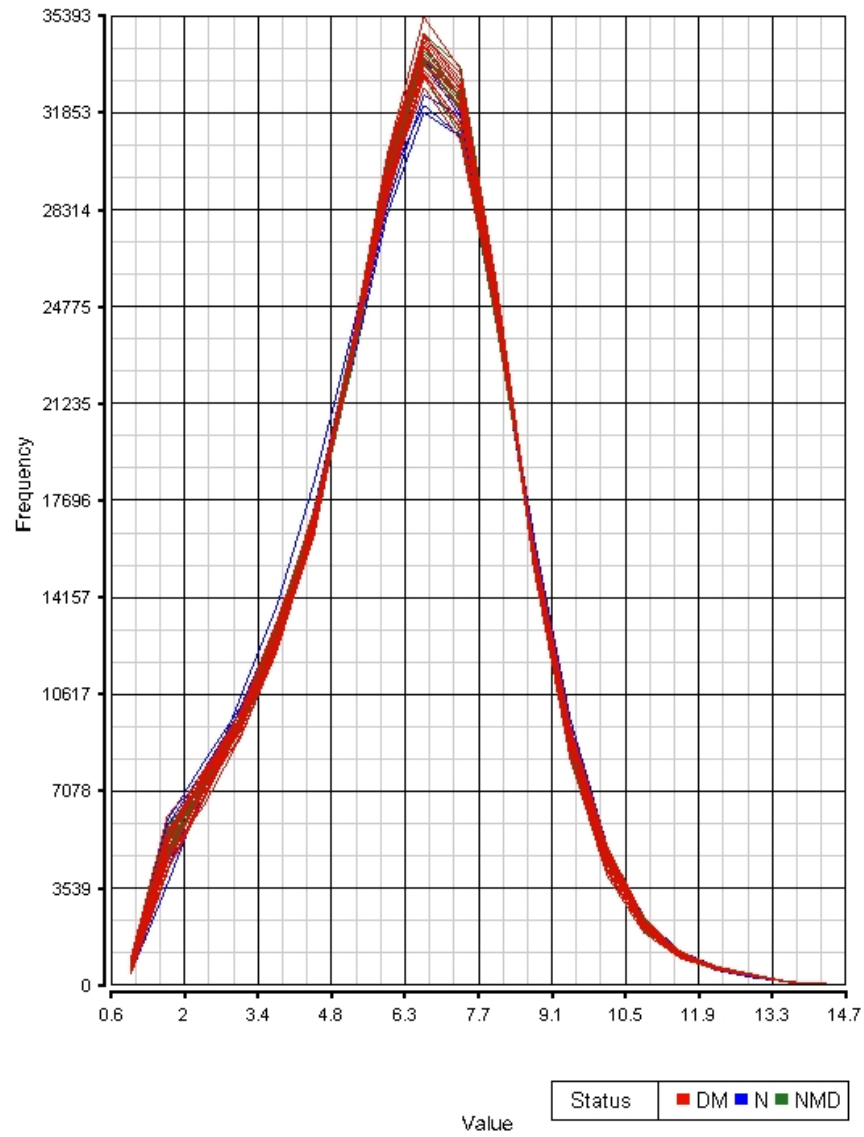

# Figure S1

**B**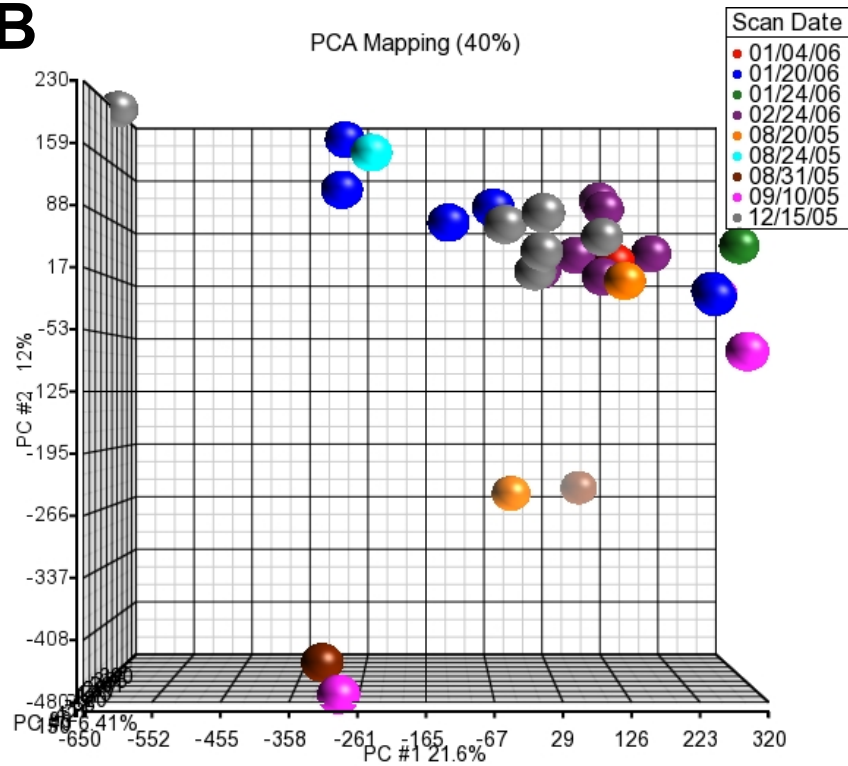**C**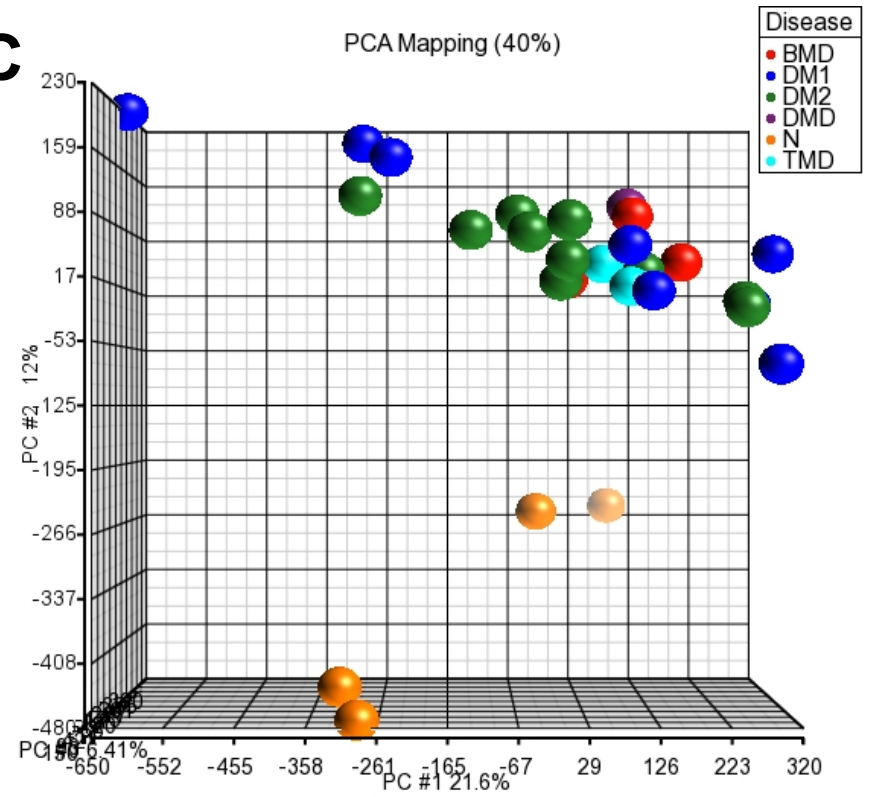

# Figure S1D

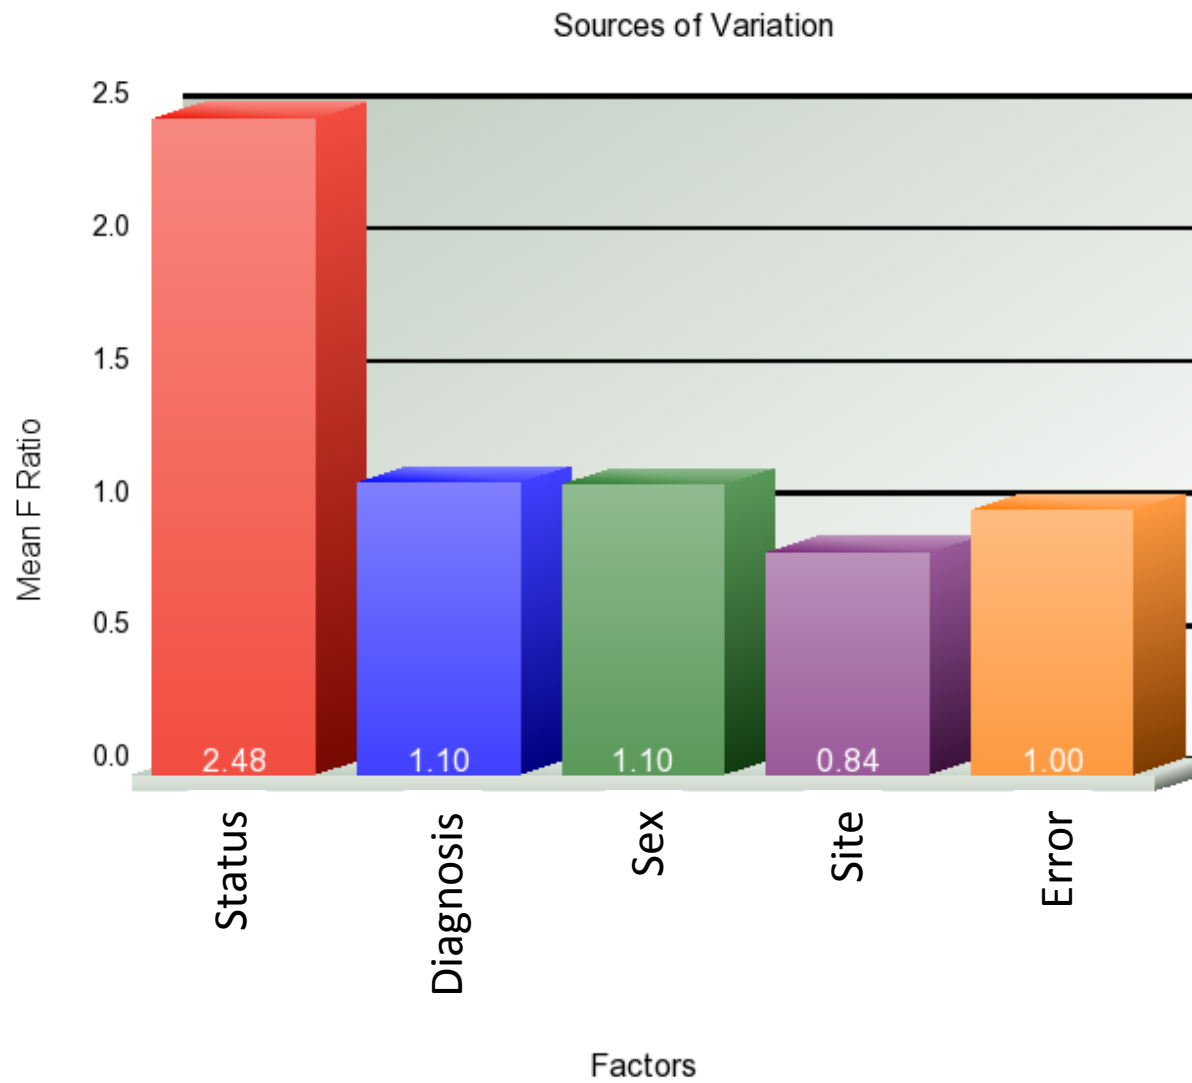

# Figure S1E

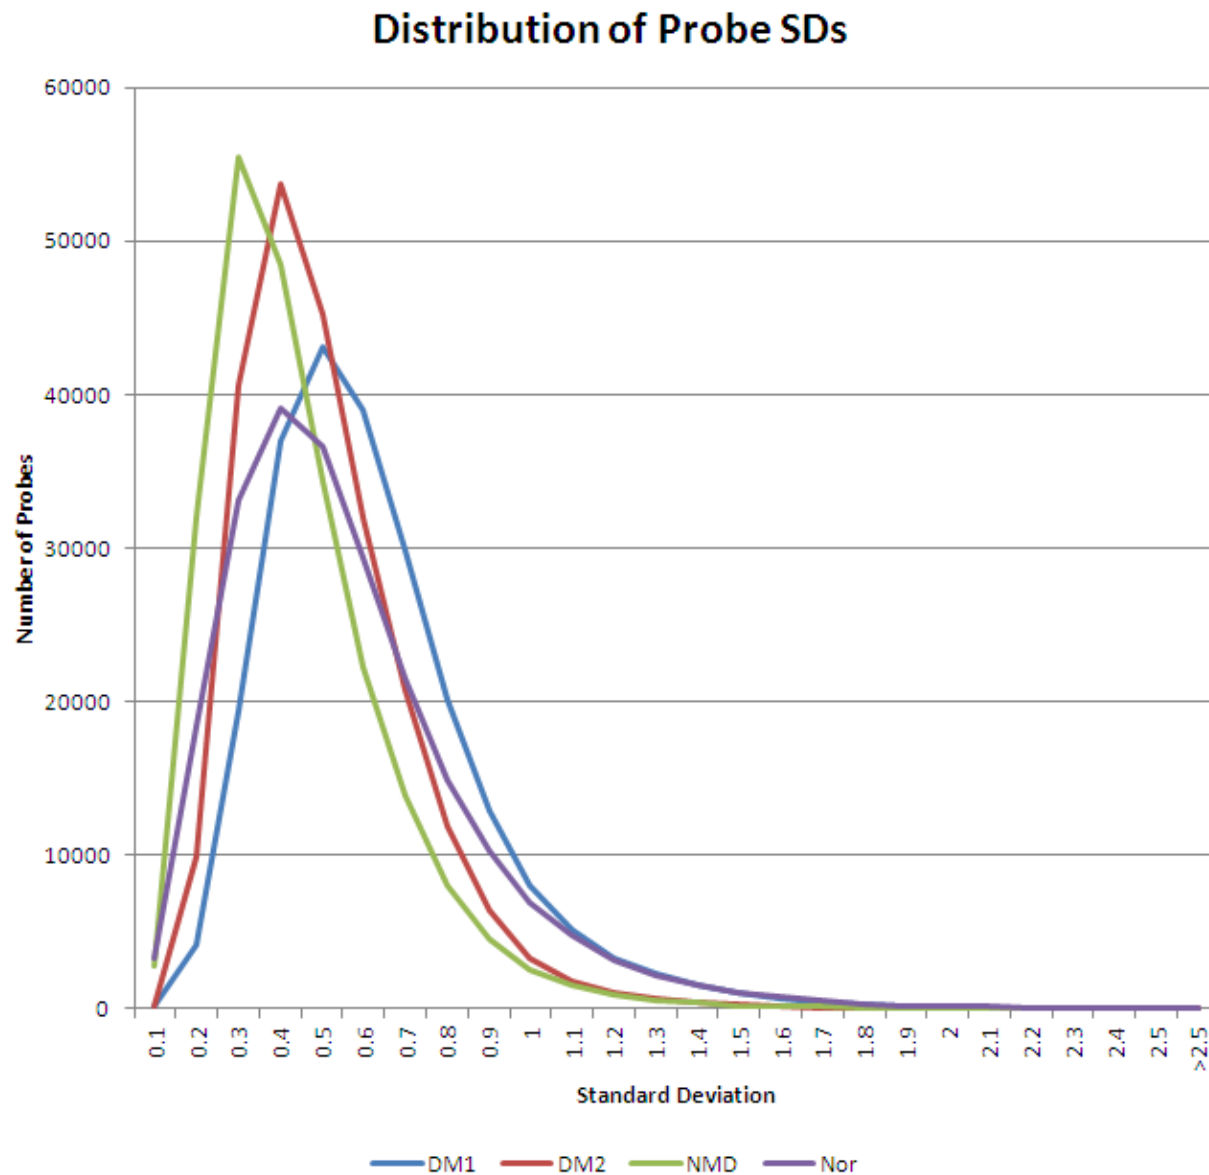

# Figure S2

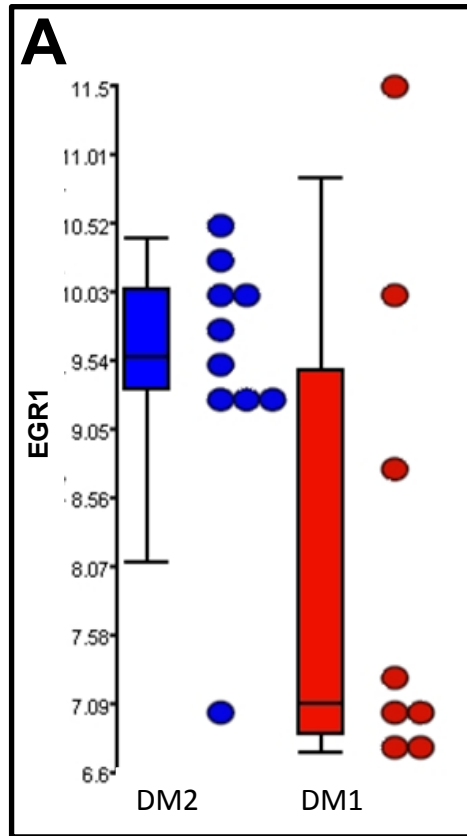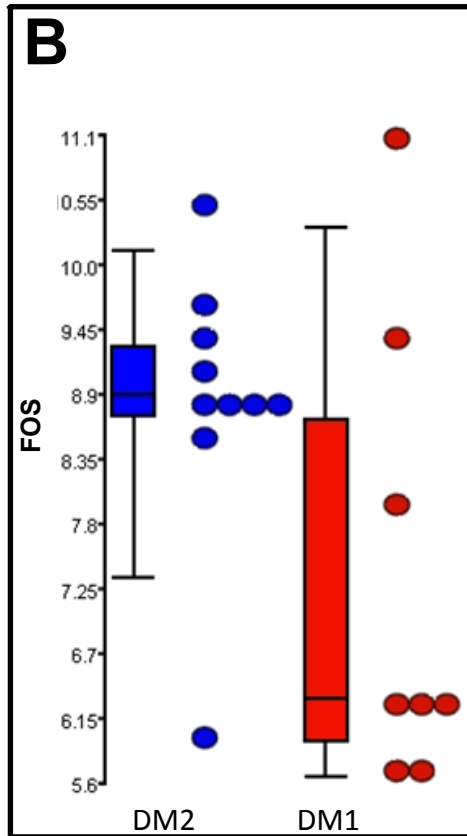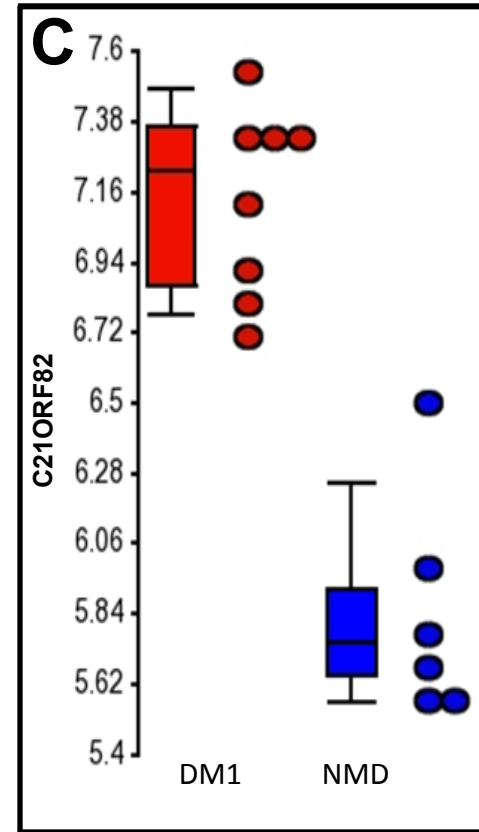

# Figure S2

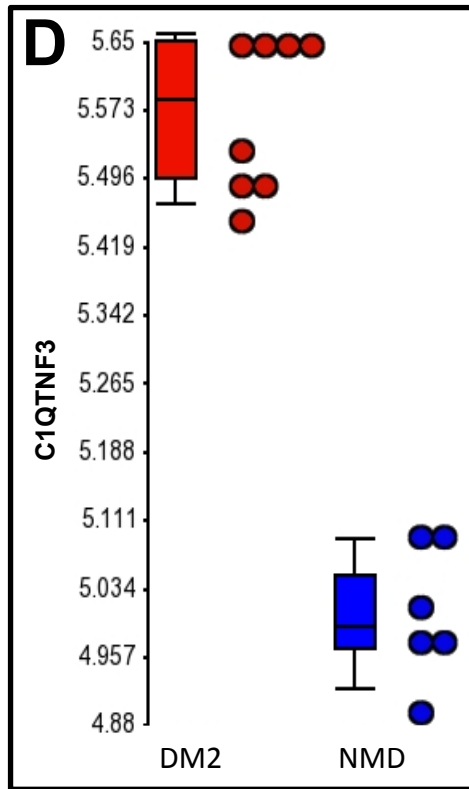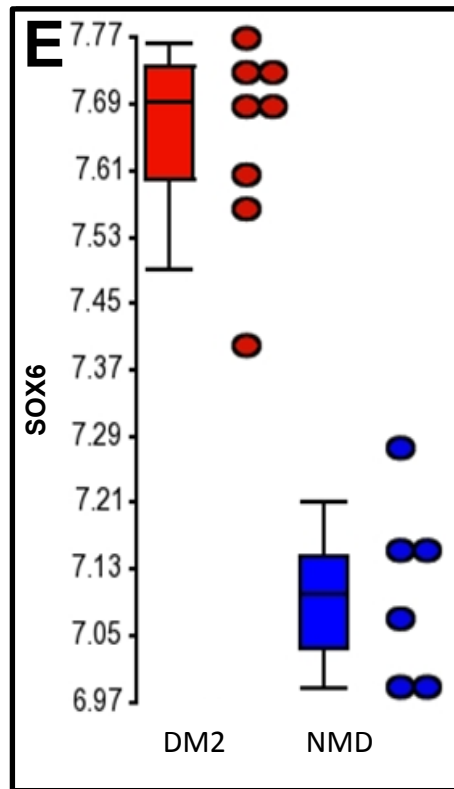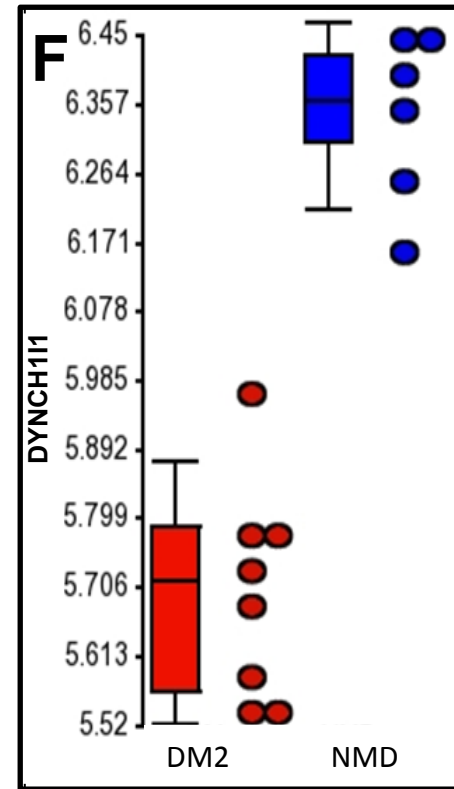

Figure S2

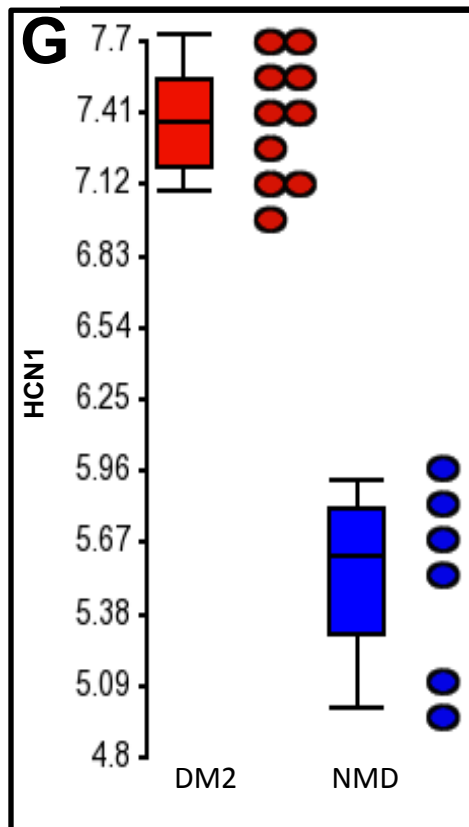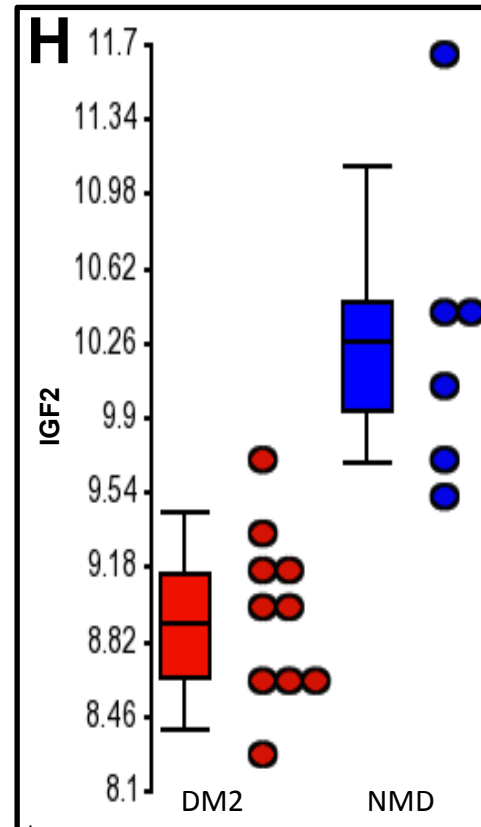

Figure S3A

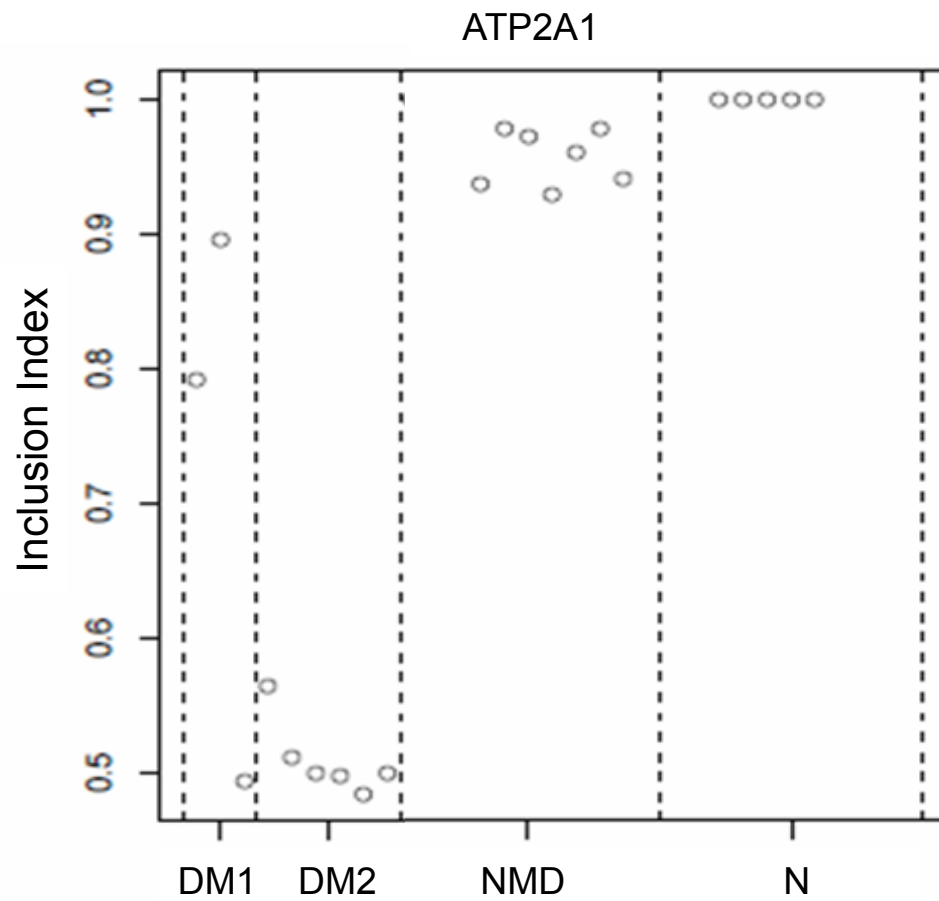



# Figure S3B

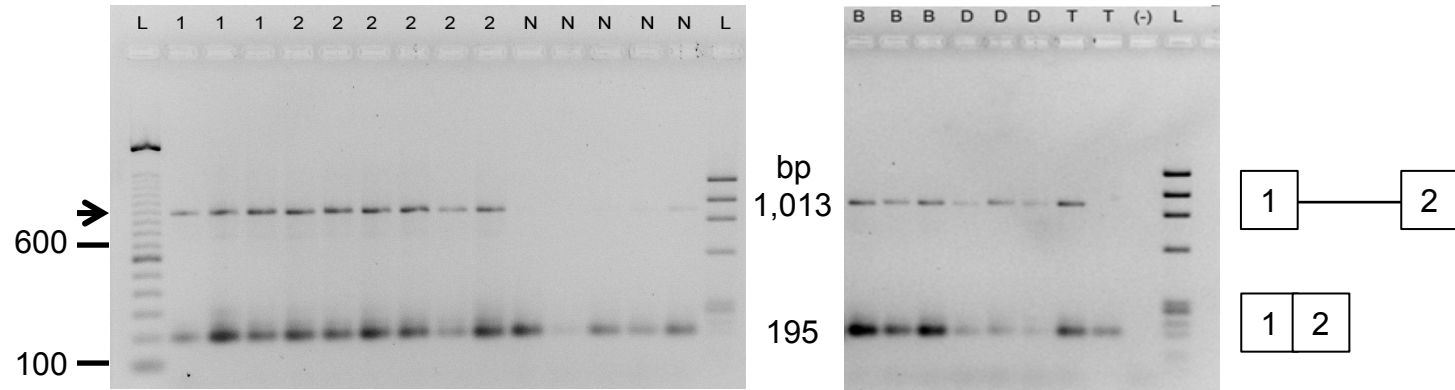

# Figure S3

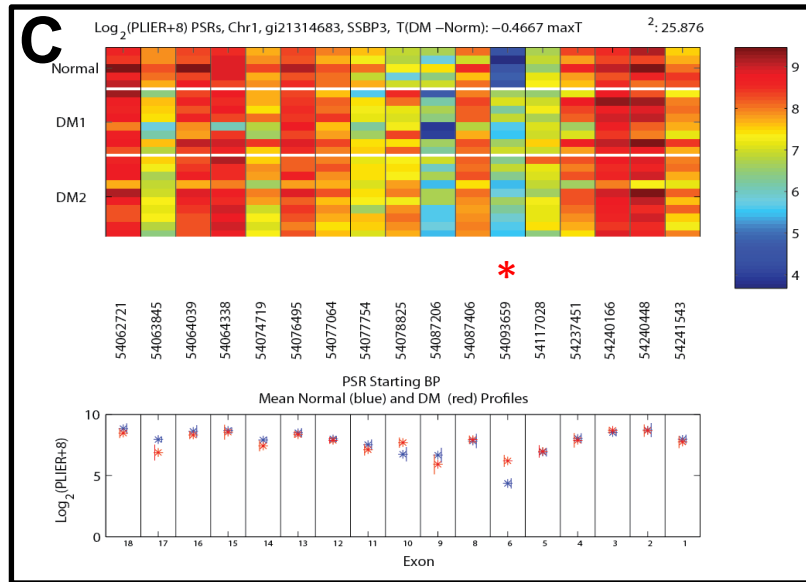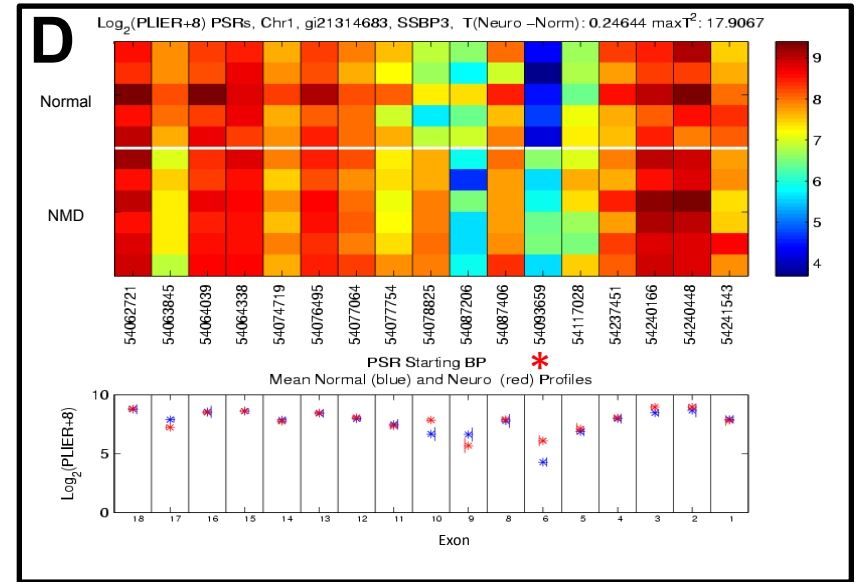

# Figure S4A

Network 1 : Intersect1-2\_20120817 - 2012-08-17 09:06 AM : Input\_Intersect1-2\_20120817.bt : Intersect1-2\_20120817 - 2012-08-17 09:06 AM

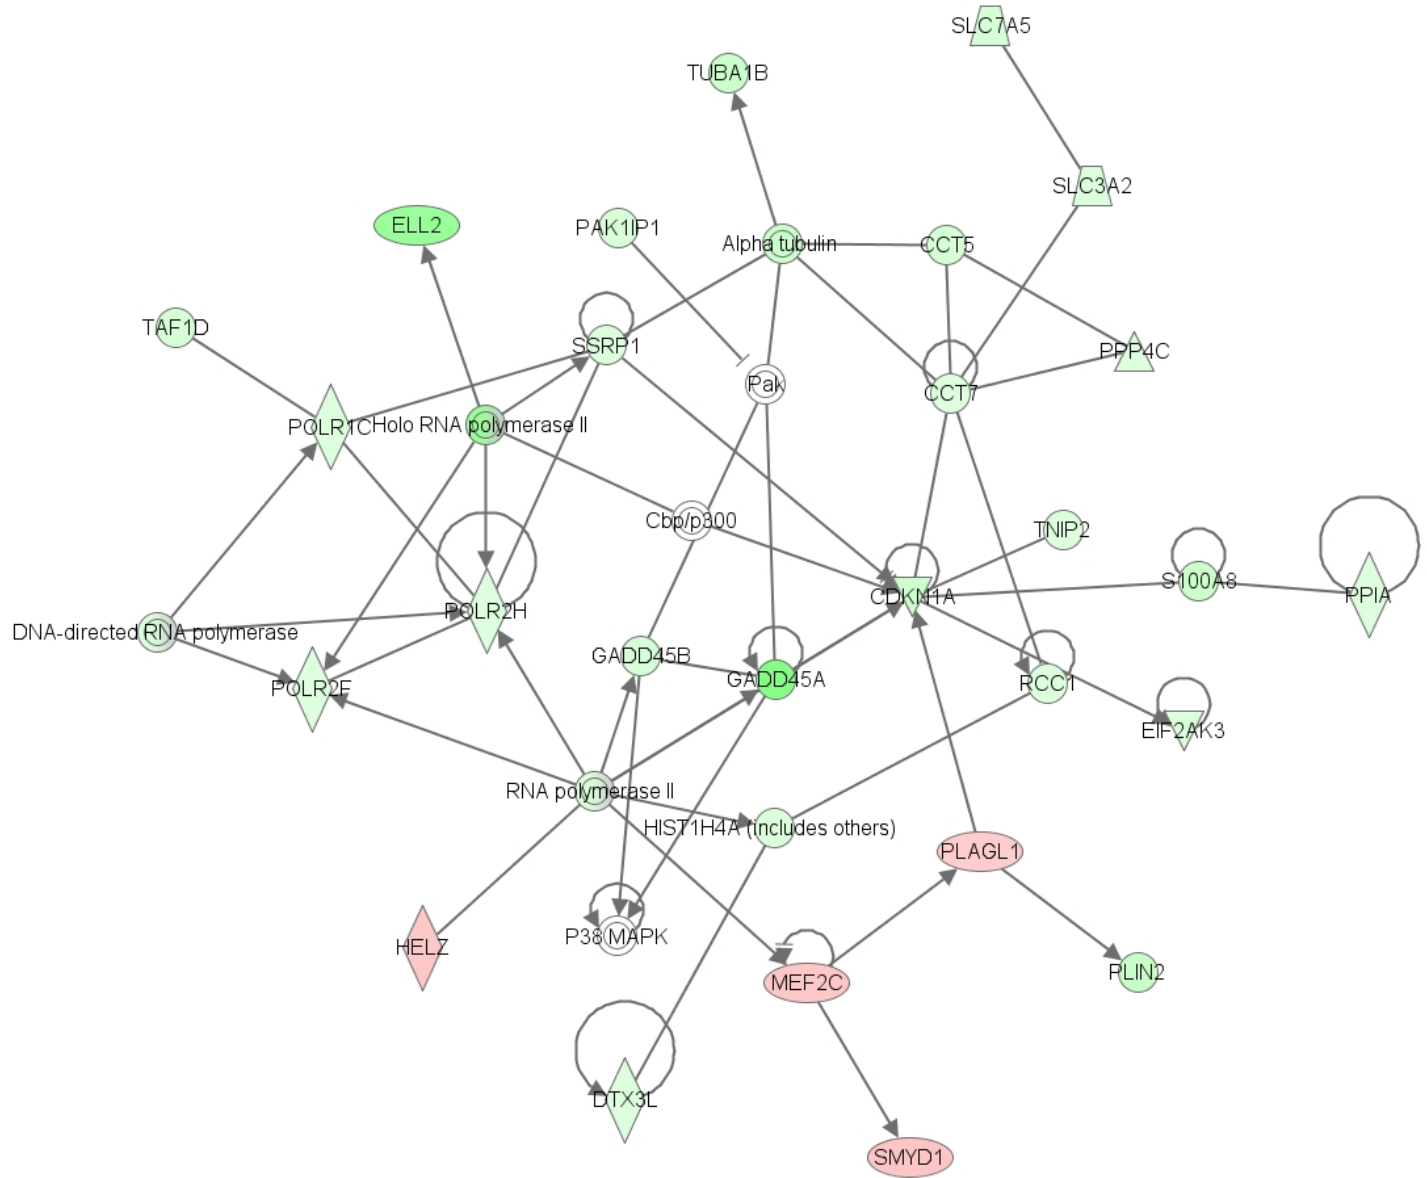

# Figure S4B

Network 5 : NMDOnly\_20120817 - 2012-08-17 09:53 AM : Input\_NMDOnly\_20120817.txt : NMDOnly\_20120817 - 2012-08-17 09:53 AM

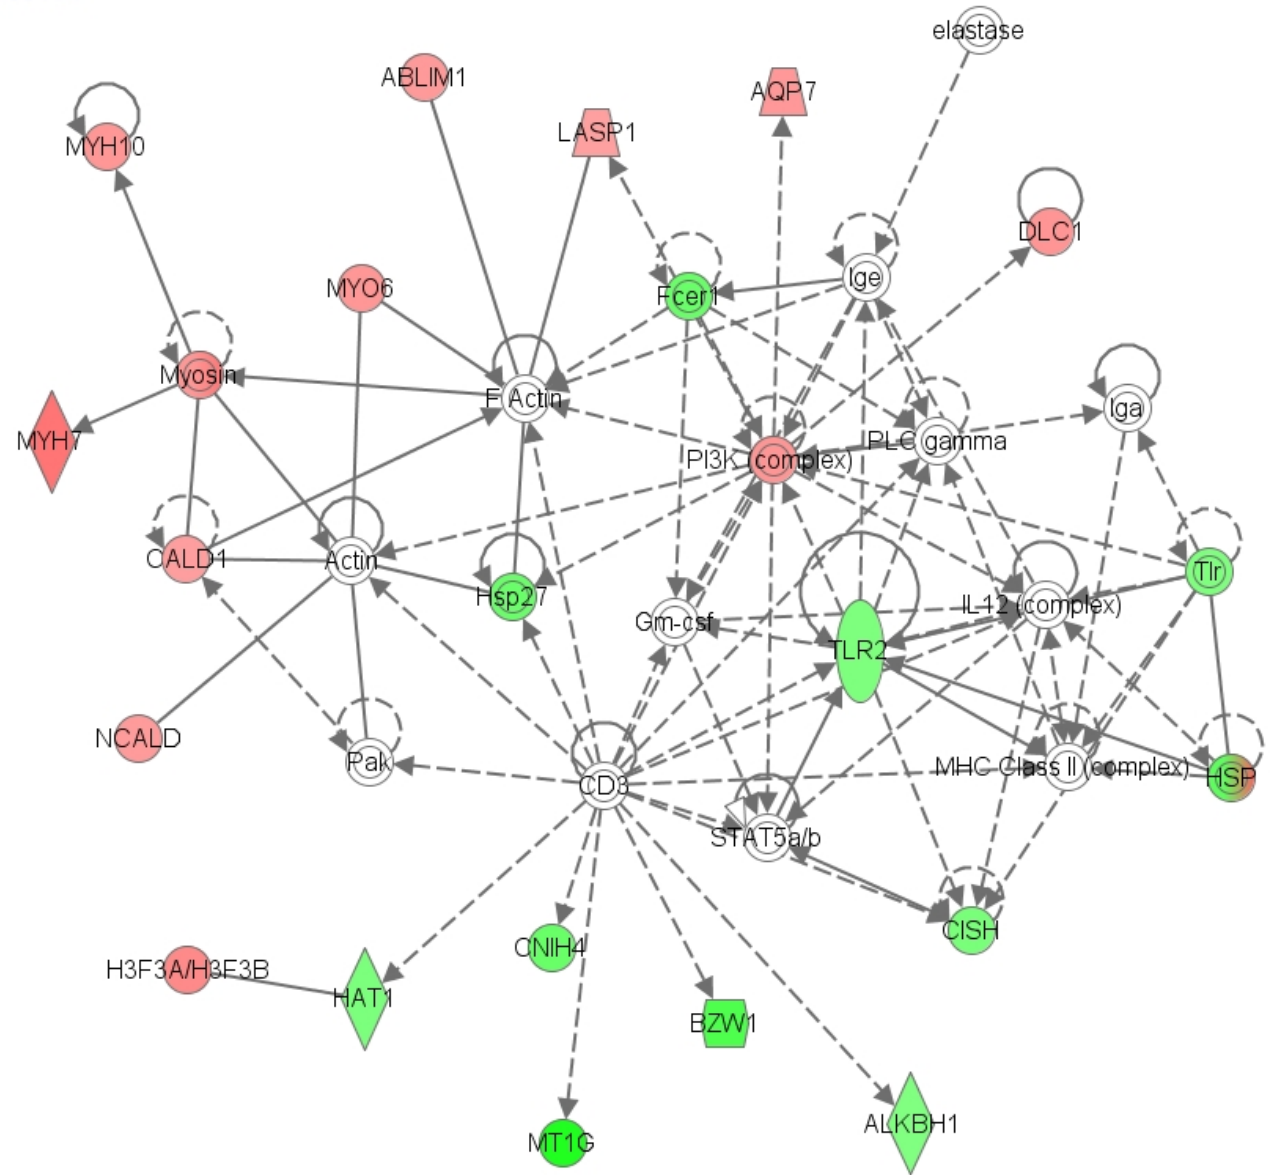

# Figure S4C

Network 1: All3Shared\_20120817 - 2012-08-17 09:52 AM : Input\_All3Shared\_20120817.txt : All3Shared\_20120817 - 2012-08-17 09:52 AM

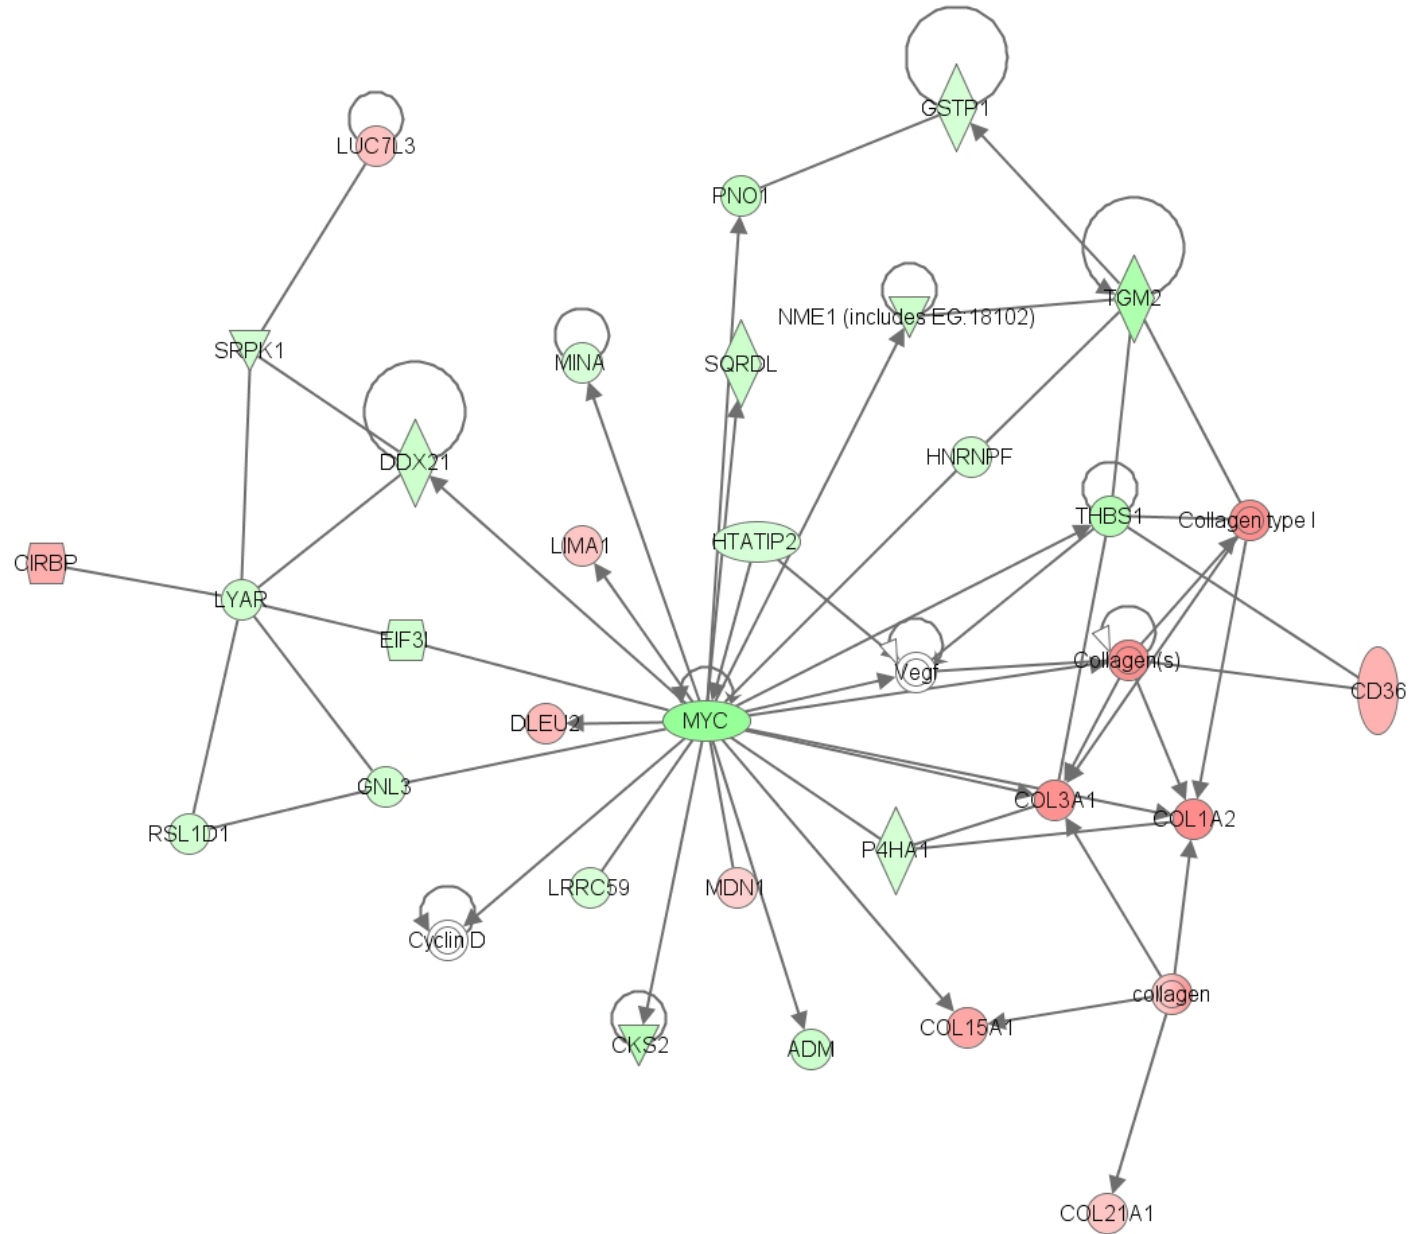

# Figure S4D

Network 3 : Input\_SharedExpr+SSBP3i - 2013-05-17 03:14 PM : Input\_SharedExpr+SSBP3i.txt : Input\_SharedExpr+SSBP3i - 2013-05-17 03:14 PM

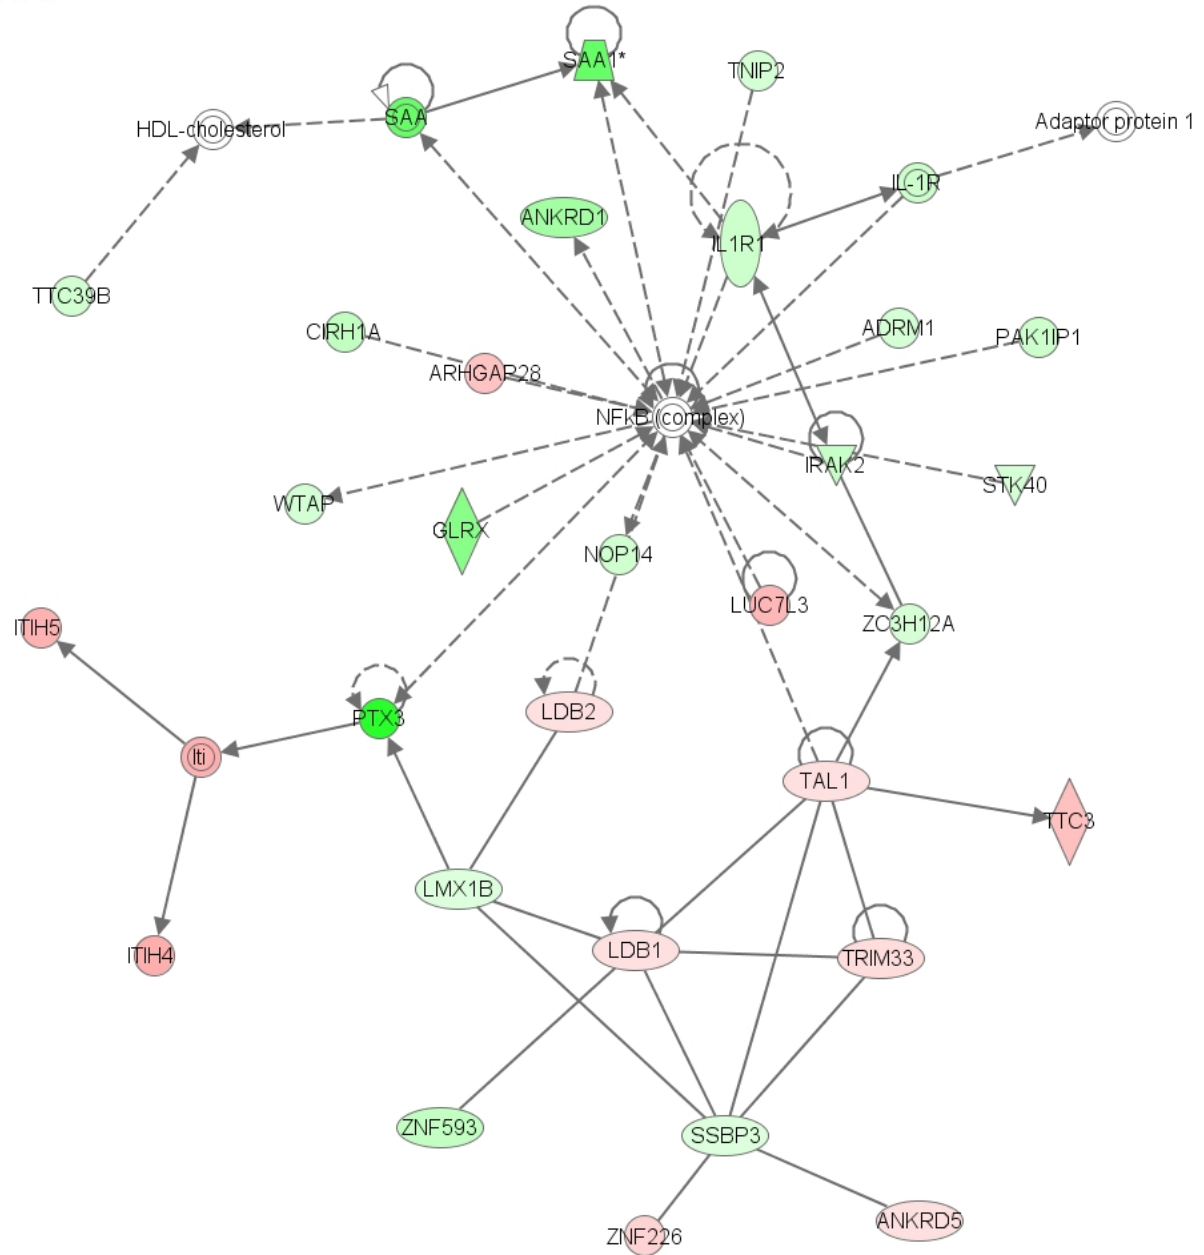

# Figure S5

## A

### Fold Change vs. CAG Repeat Length

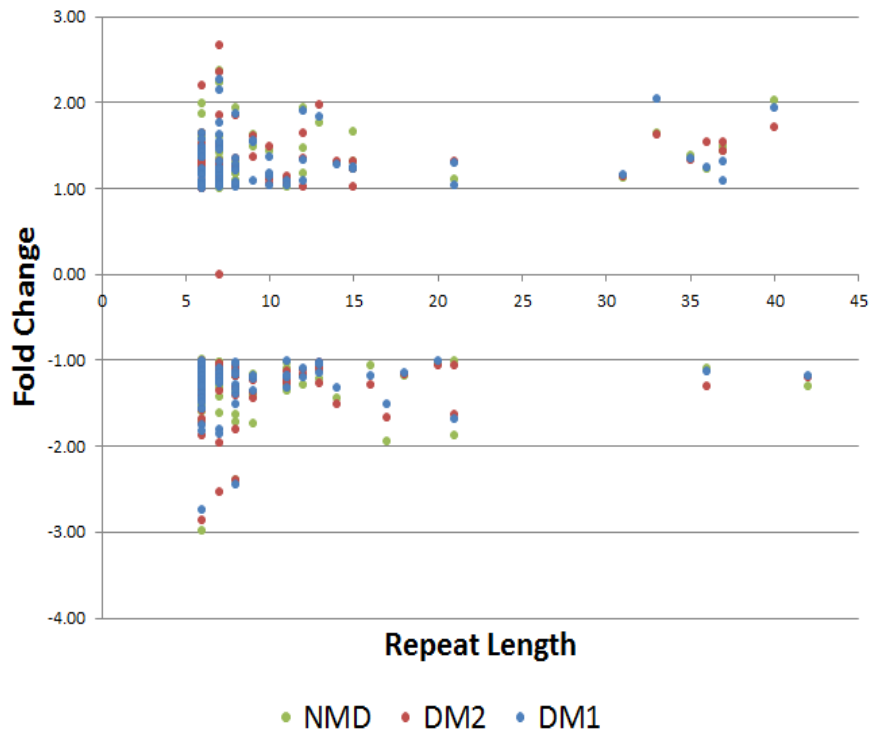

## B

### Fold Change vs. CUG Repeat Length

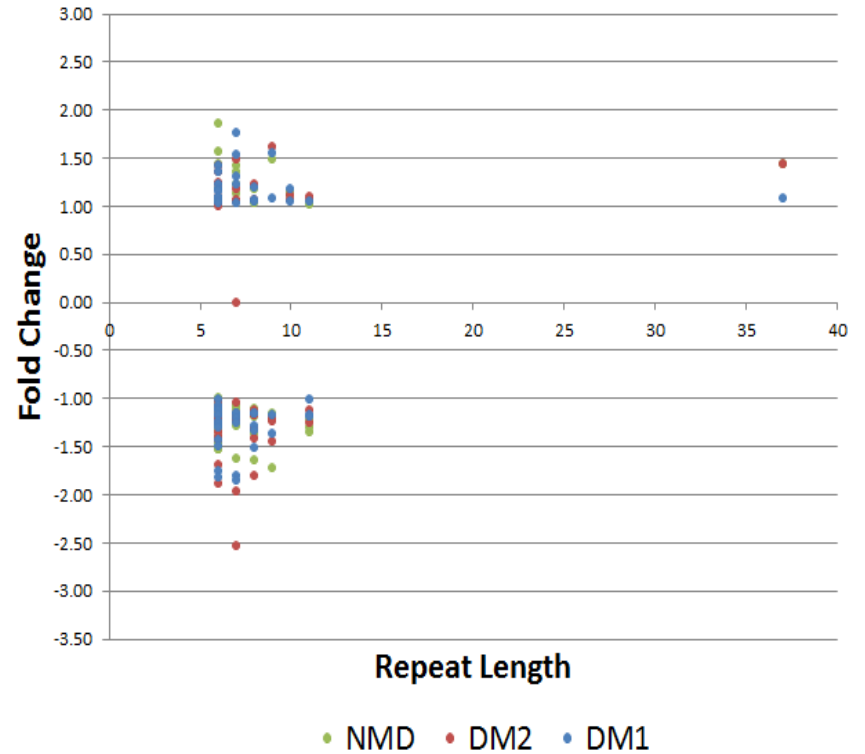

Supplement: NIHMS542084-supplement-07.pdf [file NIHMS542084-supplement-07.pdf]
